Anesthesiology  
75:707, 1991

*In Reply:*—Dr. Sosis asks if our data might be consistent with a small degree of *retrograde* amnesia caused by midazolam. He comments that the mean pretreatment memory score was 3.4 of a possible 4 points on the memory scale as we defined it. First, each data point in figure 5 represents a *corrected* memory score; as stated in the section "Statistical Analyses," a covariance adjustment was applied to correct the post-treatment response for the pretreatment response. Second, if this imperfect recall of cards shown *prior* to drug administration were due to an effect of the drug, we would expect the effect to follow a similar pattern of dose-dependent inability to recall, as seen for those cards shown *after* drug administration. We found a clear dose-dependent diminution in memory score for cards shown *after* drug administration in all three drug treatment groups. These data confirm the well-described *anterograde* amnesic effect of midazolam and show that butorphanol also causes *anterograde* amnesia, albeit to a lesser degree. We found no dose-dependent effect on the memory scores for cards shown *before* drug administration in any of the three drug treatment groups, demonstrating that within the dose and time ranges we studied, neither butorphanol nor midazolam produces *retrograde* amnesia.

Dr. Kestin's criticism of our test for supraadditivity is valid in cases that resemble his example. However, if the effects for either single drug are about the same—and significantly less than the effect of the corresponding dose of the mixture—our test provides convincing evidence of supraadditivity. This is the case for the subject-rated somatic scales "not weak/very weak" and "not thinking clearly/thinking very clearly" and for the observer-rated measure "lid droop." For several other measures the effects (at the highest dose) of the two drugs differed, and supraadditivity cannot be established by this method. The more important message to be derived from these data is that the clinician should not assume that effects will be additive when these two drugs are combined.

The method we used for the determination of the presence of supraadditivity was essentially the same as the algebraic method described by Berenbaum,<sup>1</sup> which Dr. Kestin recommends in his letter. According to this method, if  $A_e$  and  $B_e$  are equieffective doses of drugs A and B, and  $A_c$  and  $B_c$  are doses of A and B that when used in combination cause the same magnitude of effect as  $A_e$  or  $B_e$  acting alone, then synergy occurs when

$$A_c/A_e + B_c/B_e < 1.$$

At the outset of our study, we had no information on the equieffective sedative doses of midazolam and butorphanol. Indeed, the determination of this information was one of the purposes of the study. For each dose group, the amount of midazolam and butorphanol in the

combination was exactly one half the amount of each drug when tested alone. Thus, for the measures referred to above, we may show supraadditivity of the combination by showing that the equieffective dose of the combination is less than  $(\frac{1}{2}A_e + \frac{1}{2}B_e)$ . This, however, is precisely what we have demonstrated by showing that the combination has a significantly larger effect than butorphanol or midazolam alone.

The  $t$  statistics referred to the  $t$  distribution with 24 degrees of freedom as indicated by the Satterthwaite approximation.<sup>2</sup> We considered isobolographic analysis but could not apply this method because only three doses were tested for each treatment, and this would not allow us to estimate the  $ED_{50}$  values with sufficient precision.

We think it was reasonable to focus our attention upon effects at the highest doses because supraadditivity is most easily detected where effects are large, and interactions at this dose level are most likely to be of clinical importance. The presence or absence of supraadditivity at lower dose levels would not fundamentally alter our conclusions.

MARK DERSHWITZ, M.D., PH.D.

Assistant Professor of Anaesthesia  
Harvard Medical School

CARL E. ROSOW, M.D., PH.D.

Associate Professor of Anaesthesia  
Harvard Medical School

PATRICIA M. DiBIASE, R.N., B.S.N.

Clinical Research Nurse  
Anesthesia Services of Massachusetts General Hospital

ALAN ZASLAVSKY, PH.D.

Assistant Professor of Statistics  
Harvard University

Massachusetts General Hospital  
Boston, Massachusetts 02114

## REFERENCES

1. Berenbaum MC: Synergy, additivism and antagonism in immunosuppression: A critical review. *Clin Exp Immunol* 28:1-18, 1977
2. Snedecor GW, Cochran WG: *Statistical Methods*. 7th edition. Ames, University of Iowa Press, 1989

(Accepted for publication July 3, 1991.)

Anesthesiology  
75:707-708, 1991

## Pigtail Oximetry

*To the Editor:*—A variety of application sites for pulse oximeters has been described, including, most recently, the shaft of the penis.<sup>1</sup> Similar considerations apply to pulse oximetry in experimental anesthesiology, and such interest is likely to focus on the pig. As a consequence of animal protection legislation and public opinion, the experimental use of animals is currently shifting away from the classical models (cats, dogs, and primates) and toward food animals. In the United States, the dog is increasingly replaced by the pig;<sup>2</sup> in Europe, preferential

use of the pig model for experimental research was recently suggested by a working group of the *European Academy of Anaesthesiology*.<sup>3</sup> The pig, however, does not readily lend its nose, "fingertips"—or penis—to sensor application. Based upon experience with greater than 200 pigs, we have found the tail to be a most appropriate monitoring site. Data (mean  $\pm$  standard deviation) were obtained from 64 consecutive experiments under defined conditions. Model: *Sus scrofa*, German landrace,  $9 \pm 1$  weeks of age, body weight  $25.9 \pm 1.6$  kg. Anesthesia:

Piritramide 2.25 mg · kg<sup>-1</sup> · h<sup>-1</sup> plus pancuronium 0.4 mg · kg<sup>-1</sup> · h<sup>-1</sup>, intravenous. Ventilation: fractional inspired oxygen concentration 0.4 in nitrous oxide and end-tidal carbon dioxide concentration 4.6 ± 0.3%. Core temperature: 39.7 ± 1.4° C (normothermia). Volume status: pulmonary capillary wedge pressure 6.5 ± 2.7 mmHg and CVP 6.8 ± 2.6 mmHg.

Mean partial saturation of hemoglobin with oxygen in arterial blood (SpO<sub>2</sub>)<sup>4</sup> as assessed by means of standard two-wavelength pulse oximetry, was 97.7 ± 1.3% with a median of 98 and a range of 93–99%. (These data do not allow extrapolation to "true" saturation (SpO<sub>2</sub>), as measured *in vitro* with oximeters using four to seven wavelengths, unless the presence of methemoglobin and CO-hemoglobin in pigs is taken into account.) We conclude that the use of pigs for experimental research will not be hampered by the lack of a suitable site for pulse oximetry!

JAN-PETER A. H. JANTZEN, PRIV.-DOZ.

DR. MED., D.E.A.A.

Associate Professor of Anesthesiology

HANS JÜRGEN HENNES, DR. MED.

Department of Anaesthesiology

Anesthesiology  
75:708, 1991

Johannes Gutenberg-University Medical School at Mainz  
Klinik für Anästhesiologie  
Langenbeckstraße 1  
D-6500 Mainz 1  
Germany

## REFERENCES

1. Robertson RE, Kaplan RF: Another site for the pulse oximeter probe (correspondence). *ANESTHESIOLOGY* 74:198, 1991
2. Swindle MM: Swine as a replacement for dogs in the surgical teaching and research laboratory. *Lab Anim Sci* 34:383–385, 1984
3. Animal research in cardiopulmonary resuscitation: Recommendations of a working party of the European Academy of Anaesthesiology. *Eur J Anaesthesiol* 5:287–289, 1988
4. Zander R, Mertzluft F: Oxygen parameters of blood: definitions and symbols. *Scand J Clin Lab Invest* 50(Suppl 203):177–185, 1990

(Accepted for publication July 3, 1991.)

## Epidural Abscess Associated with Epidural Catheterization

*To the Editor:*—Since the incidence of epidural abscess is so rare, much of the "conventional wisdom" surrounding this complication is derived from anecdotal case reports rather than carefully controlled studies. This makes it extremely difficult to draw meaningful conclusions about the prevention, diagnosis, and treatment of this dreaded complication.

The recent paper by Strong raises several interesting questions.<sup>1</sup> Strong reports a 3% incidence of epidural abscess after epidural catheterization for pain therapy. In view of his small sample size (approximately 60 catheter placements), this high complication rate may simply reflect extraordinarily bad luck rather than an accurate statistical analysis of occurrence.

Strong uses the interesting technique of placing an epidural catheter and injecting it intermittently until the patient is pain-free.<sup>1</sup> The catheter is then removed and is replaced when the patient notes recurrence of pain. Would single-shot epidural injections have a more favorable risk-to-benefit ratio given the inability to predict the amount of time a catheter is needed to achieve initial as well as long-term pain relief?

Strong notes that the catheters were injected by several different residents.<sup>1</sup> It seems logical that the more individuals that are involved in the use of an epidural catheter, the more likely that a break in sterile technique can occur. The delivery of epidural local anesthetic *via* continuous infusion pump would decrease this problem while decreasing the number of times the catheter is manipulated.

Strong reports the use of prophylactic antibiotics according to "our routine for epidural catheters that remain in place for more than 24 h."<sup>1</sup> It is unclear when the antibiotics are given relative to catheter placement. Although it seems logical that antibiotics should decrease the incidence of epidural-catheter-related infection, I know of no controlled study that demonstrates the efficacy of this practice. Conceivably, antibiotics used in this manner can increase the infection risk by destroying nonpathogenic bacteria and by allowing drug resistant pathogens to flourish.

In view of the fact that two epidural-catheter-related infections occurred in a relatively brief period of time, it may be worthwhile to

identify any epidemiologic factors common to both patients. Did any of the nurses, physicians, corpsmen, or other staff have *Staphylococcus* infections at the time that both patients were under their care? Were cultures taken from these caregivers to see if any were carrying the same pathogenic strain of *Staphylococcus* identified in the first patient (cultures were negative in the second)? Was any common equipment used for both patients?

Finally, Strong mentions the fact that tunneling epidural catheters provides additional protection against infection.<sup>2</sup> In view of the simplicity and added safety that tunneling affords, this technique should be used whenever there is the potential for an epidural catheter to be left in place for more than 24 h or when the patient appears to be at higher risk for developing infection.<sup>3</sup>

STEVEN D. WALDMAN, M.D.

Director

Pain Consortium of Greater Kansas City

Clinical Professor of Anesthesiology

University of Missouri-Kansas City School of Medicine

11111 Nall #202

Leawood, Kansas 66211

## REFERENCES

1. Strong SE: Epidural abscess associated with epidural catheterization: A rare event? Report of two cases with markedly delayed presentation. *ANESTHESIOLOGY* 74:943–946, 1991
2. Waldman SD: Implantable drug delivery systems: practical considerations. *J Pain Symptom Management* 5:169–174, 1990
3. Waldman SD: A simplified approach to the subcutaneous placement of epidural catheters for long-term administration of morphine. *J Pain Symptom Management* 2:163–166, 1987

(Accepted for publication July 5, 1991.)
